# Supplementary material for: Solid–liquid separation of lignocellulosic sugars from biomass by rotating ceramic disc filtration
Source: Royal Society of Chemistry journal article supplement (doi:10.1039/d4gc04533e), 2024-01-01
Supplement: d4gc04533e2.xlsx [file d4gc04533e2.xlsx]

## Sheet: TOC
Tab name	Experiment(s) Desc.	Corresponding Figures and Tables
Viscosity	Data on the dynamic viscosity of DDR-EH as a function of shear at 3,6, and 9 wt% insoluble solids.	Fig. 1
Batch Filtration	Data for batch filtration at 300, 600, and 1,200 rpm. The flux is reported in LMH (liters per square meter per hour)	Fig. 3A
Continuous Filtration	Continuous filtration were performed at 1,200 rpm with 8, 11, and 13 wt% insoluble solids in the retentate. Each experiment was performed on 10 L of feed material and generated 8 L of permeate.	Fig. 3B
Energy	The impact of rotation velocity and hydrolysate insoluble solids content on the minimum energy demand per square meter of membrane area.	Fig. 5

## Sheet: Viscosity
Insoluble solids (wt%)	Shear Rate (1/s)	Viscosity (mPa s)
3	2.42873	178
3	6.07183	71.2
3	12.1437	45.8
3	24.2873	22.9
3	48.5746	14
6	2.42873	382
6	6.07183	122
6	12.1437	66.2
6	24.2873	33.1
6	48.5746	15.3
9	2.42873	1120
9	6.07183	417
9	12.1437	229
9	24.2873	109
9	48.5746	58.5
12	2.4	2240
12	6.1	906
12	12.1	442
12	24.3	236
12	48.6	124

## Sheet: Batch
Time (sec), 20Hz	LMH, 20 Hz	Time (sec), 10 Hz	LMH, 10Hz	Time (sec), 5 Hz	LMH, 5 Hz	Time (sec), Cake Formation	LMH, Cake Formation
10	170.322	0	193.781	0	186.874	0	192.795
20	160.094	10	176.082	10	168.18	10	169.264
30	141.194	20	157.254	20	154.22	20	152.67
40	131.411	30	143.999	30	141.947	30	140.161
50	128.52	40	134.559	40	130.711	40	130.295
60	125.741	50	126.451	50	118.957	50	122.257
70	121.405	60	118.894	60	106.748	60	115.544
80	120.515	70	112.442	70	100.668	70	109.828
90	119.404	80	106.443	80	98.3171	80	104.884
100	119.07	90	100.192	90	97.8144	90	100.553
110	118.403	100	95.4217	100	97.4578	100	96.7172
120	117.736	110	90.4761	110	97.7496	110	93.2896
130	120.293	120	85.8569	120	92.0263	120	90.2023
140	114.512	130	80.9114	130	82.1038	130	87.4026
150	119.959	140	77.9742	140	71.7436	140	84.8483
160	114.623	150	74.2838	150	62.1615	150	82.5057
170	119.181	160	70.7943	160	52.9524	160	80.3469
180	114.734	170	68.1583	170	44.5215	170	78.3492
190	120.182	180	65.899	180	40.5128	180	76.4935
200	113.622	190	64.0412	190	36.8311	190	74.7636
210	116.846	200	63.012	200	33.3993	200	73.1461
220	117.18	210	47.3217	210	30.0756	210	71.6292
230	109.398	220	31.2549
240	123.628
250	123.072
260	125.407
270	123.072
280	124.851
290	126.63
300	125.185
310	125.963
320	121.516
330	107.285
340	88.4965
350	61.7029
360	33.4641
370	12.4518

## Sheet: Continuous
Time (min)	LMH, 13%	Time (min)	LMH, 11%	Time (min)	LMH, 8%
1	88.8776	1	95.6806	1	109.315
2	91.7735	2	96.4835	2	106.874
3	89.8447	3	97.5512	3	104.705
4	87.7747	4	98.7512	4	102.566
5	83.2924	5	99.8065	5	101.246
6	78.4624	6	100.839	6	101.086
7	73.5212	7	101.61	7	101.854
8	69.8771	8	101.707	8	103.17
9	66.9071	9	101.492	9	103.022
10	64.5	10	101.169	10	102.159
11	62.4565	11	100.645	11	101.689
12	60.7394	12	98.9965	12	100.83
13	60.0724	13	98.5606	13	99.9265
14	59.6488	14	96.6053	14	99.6706
15	59.4794	15	94.3994	15	99.81
16	59.4741	16	92.3047	16	100.627
17	60	17	90.06	17	101.67
18	58.7929	18	88.2141	18	103.269
19	57.7165	19	86.5271	19	104.963
20	57.5524	20	84.8929	20	106.504
21	57.9865	21	83.5518	21	107.827
22	57.3476	22	83.3412	22	109.367
23	54.8329	23	85.0176	23	110.055
24	51.3053	24	86.4412	24	110.137
25	48.7818	25	86.6255	25	109.855
26	48.1341	26	86.1118	26	108.524
27	44.6488	27	85.549	27	107.288
28	46.9253	28	84.9529	28	105.849
29	46.4876	29	84.1804	29	104.216
30	45.4782	30	83.4255	30	103.163
31	43.8971	31	82.5882	31	102.69
32	43.4188	32	81.7624	32	101.573
33	44.13	33	77.4865	33	100.839
34	46.0253	34	74.9153	34	99.8453
35	46.9129	35	73.7647	35	98.6841
36	46.3288	36	73.1312	36	98.0753
37	45.9124	37	72.8171	37	97.3271
38	45.5188	38	72.5594	38	96.8453
39	45.3688	39	72.4288	39	96.6582
40	44.8729	40	72.2806	40	96.6847
41	44.698	41	72.1888	41	96.2224
42	45.2392	42	72.1376	42	95.9392
43	45.7824	43	72.5876	43	95.3449
44	46.2294	44	73.0924	44	94.2309
45	46.6902	45	73.6394	45	95.1507
46	46.9627	46	74.2871	46	95.7331
47	47.0608	47	74.8694	47	96.7059
48	47.098	48	75.6071	48	97.6676
49	47.3412	49	76.29	49	98.4993
50	48.1255	50	76.5494	50	99.536
51	48.4006	51	76.8653	51	100.579
52	48.2241	52	77.0753	52	100.151
53	48.1447	53	77.2924	53	99.8824
54	48.1059	54	77.4759	54	100.929
55	48.0706	55	77.5147	55	99.9098
56	47.9029	56	77.4565	56	98.951
57	47.8129	57	77.3524	57	97.7294
58	47.6929	58	77.2588	58	96.3431
59	47.3435	59	77.1371	59	95.5824
60	46.5388	60	77.3965	60	94.3431
61	45.6035	61	77.5218	61	93.5784
62	44.7247	62	77.6841	62	93.249
63	43.7065	63	77.5447	63	93.2686
64	43.0782	64	77.2676	64	93.3071
65	42.5435	65	76.9182	65	93.0794
66	42.0671	66	76.6447	66	92.8324
67	41.4971	67	76.4259	67	92.7794
68	40.9924	68	76.1118	68	92.9824
69	40.3924	69	75.9529	69	92.4547
70	39.7676	70	75.7627	70	92.7106
71	39.2594	71	76.0471	71	92.5588
72	39.06	72	75.9255	72	92.1935
73	38.9206	73	75.9667	73	91.5688
74	38.3806	74	76.0431	74	91.6553
75	37.6888	75	76.2549	75	91.7241
76	37.1224	76	76.302	76	91.7612
77	36.5506	77	76.2765	77	91.6394
78	35.91	78	76.0392	78	91.4224
79	35.7335	79		79	91.3694
80	35.9135	80	76.9553	80	90.9229
81	35.9771	81	75.9671	81	90.7359
82	35.7124	82	75.6459	82	90.69
83	35.6047	83	74.9894	83	90.6759
84	35.5641	84	74.4706	84	90.3953
85	35.4706	85	73.9235	85	90.2541
86	35.4829	86	73.4259	86	90.3124
87	35.6929	87	72.9282	87	90.33
88	36.2929	88	72.8082	88	90.4078
89	36.2682	89	72.7059	89	90.2412
90	35.9047	90	72.4235	90	90.7314
91	35.7106	91	72.1553	91	91.3216
92	35.6965	92	72.0529	92	91.7059
93	35.5059	93	71.9188	93	91.8627
94	35.31	94	71.6859	94	88.4333
95	35.1653	95	75.7765	95	80.551
96	35.0471	96	80.6541	96	82.1373
97	34.7506	97	84.1976	97	81.2784
98	34.2265	98	87.5682	98	77.9488
99	33.6794	99	90.0071	99	75.8135
100	33.5347	100	87.3918	100	76.1979
101	33.3282	101	83.94	101	74.2173
102	32.9241	102	81.8259	102	71.8563
103	33.0124	103	79.8812	103	68.8836
104	33.2153	104	79.0271	104	70.223
105	33.5329	105	78.9282	105	79.9688
106	33.6176	106	78.9388	106	73.5478
107	33.7288	107	78.8224
108	34.2071	108	78.6988
		109	78.5647
		110	78.9071

## Sheet: Energy
RPM	Power(W/m2) (3% insoluble solids)	RPM	Power(W/m2) (6% Insoluble solids)	RPM	Power(W) (9% insoluble solids)	RPM	Power(W) (12% insoluble solids)
200	1.19813	200	1.55093	200	3.45976	200	6.6812
400	2.36113	400	3.22115	400	7.01326	400	13.3485
600	3.53259	600	4.94056	600	10.6041	600	20.1311
800	4.75488	800	6.69451	800	14.2219	800	26.9477
1000	5.94919	1000	8.47548	1000	17.864	1000	33.793
1000	7.2	1200	10.2876	1000	21.5	1000	39.7
